# Supplementary material for: The structural effects of the Cys-S-S-Cys bridge exchange by the His-Cu(II)-His motif studied on natural peptides — a promising tool for natural compounds-based design
Source: Royal Society of Chemistry journal article supplement (doi:10.1039/b901676g), 2009-01-01
Supplement: b901676g.pdf [file b901676g.pdf]

# Electronic Supplementary Information

belonging to the paper

## **The structural effects of the Cys-S-S-Cys bridge exchange by the His-Cu(II)-His motif studied on natural peptides – a promising tool for natural compounds-based design**

**Justyna Brasuń,<sup>a,\*</sup> Marek Cebrat,<sup>b</sup> Łukasz Jaremko,<sup>c,d</sup> Mariusz Jaremko,<sup>c</sup> Gregor Ilc,<sup>e</sup> Olimpia Gładysz<sup>a</sup> and Igor Zhukov<sup>c,e</sup>**

<sup>a</sup> *Department of Inorganic Chemistry, Wrocław Medical University, Szewska 38, 50-139 Wrocław, Poland, tel. +48-071-784-03-30, fax +48-071-784-03-36,*

<sup>b</sup> *Faculty of Chemistry, University of Wrocław, F. Joliot- Curie 14, 50-383 Wrocław, Poland*

<sup>c</sup> *Institute of Biochemistry and Biophysics, Polish Academy of Sciences, Pawińskiego 5a, 02-106, Warsaw, Poland*

<sup>d</sup> *Institute of Genetics and Biotechnology, Warsaw University, Pawińskiego 5A, 02-106 Warsaw, Poland*

<sup>e</sup> *Slovenian NMR Center, National Institute of Chemistry, Hajdrihova 19, SI-1000 Ljubljana, Slovenia*

E-mail: [jbrasun@chnorg.am.wroc.pl](mailto:jbrasun@chnorg.am.wroc.pl)

## Synthetic Procedures and Full Experimental Details

### Peptide Synthesis

Peptides were obtained by the manual solid phase synthesis method on the Rink amide resin (0.61 mmol/g, Iris Biotech GmbH) using standard Fmoc procedures. After completion of the peptide sequence, the crude products were cleaved from the resin by "Reagent K" (TFA : phenol : H<sub>2</sub>O : thioanisole : ethanedithiol; 82.5: 5 : 5 : 5 : 2.5) for 2 hours at r.t., precipitated into cold diethyl ether, filtered and washed with ether, dissolved in water and lyophilized. Peptides were purified by semipreparative C-18 reversed phase HPLC (Varian ProStar system). The chemical identity of the products was confirmed by ESI-MS (Bruker micrOTOF-Q spectrometer).

### Potentiometric Studies

Stability constants were calculated from titration curves. Titrations were carried out at 25°C using sample volumes of 1.5 ml. The ligand concentration was  $1 \times 10^{-3}$  M and the metal-to-ligand ratio was 1:2.

The pH-metric titrations were performed in 0.1 M KNO<sub>3</sub> on a MOLSPIN pH-meter system using a Mettler Toledo InLab 422 semi-micro combined electrode calibrated in hydrogen ion concentration using HNO<sub>3</sub>. Stability constants  $\beta_{pqr} = [M_p H_q L_r] / [M]^p [H]^q [L]^r$  and stoichiometry of complexes were calculated with the SUPERQUAD program.<sup>1</sup> Standard deviations quoted were also computed by SUPERQUAD and referred to random errors only.

### Absorption, CD and EPR spectroscopic measurements

Absorption spectra were recorded on a Perkin–Elmer Lambda Bio 20 spectrophotometer, circular dichroism (CD) spectra on a JASCO J715 spectropolarimeter in the 200-850 nm range, and electron paramagnetic resonance (EPR) spectra on a Bruker ESP 300E

spectrometer at X-band frequency (9.4 GHz) at 120 K. Concentration of the ligand was  $1 \times 10^{-3}$  M and the metal-to-ligand ratio was 1:2.

## NMR studies

***Sample preparation and sequential assignment.*** NMR samples of both peptides were prepared in H<sub>2</sub>O/D<sub>2</sub>O (9:1, v:v) solution. The concentrations of the peptides were 3.2 mM and 2.8 mM for [His<sup>1,6</sup>]OXT and [His<sup>1,6</sup>]AVP, respectively. The pH was adjusted to  $6.0 \pm 0.2$  (uncorrected value) by adding small amount of 0.1 M NaOH stock solution. The desired concentrations of Cu(II) ions were obtained by adding adequate volumes of stock CuSO<sub>4</sub> solution, the pH was checked and adjusted after every addition, if needed.

All NMR experiments were performed at 28°C on 18.8 T Varian VNMRS NMR spectrometer (<sup>1</sup>H frequency 799.806 MHz) equipped with four channels, z-gradients PFG unit, and <sup>1</sup>H/<sup>13</sup>C/<sup>15</sup>N probehead. The recorded 1D <sup>1</sup>H NMR spectra were processed and analyzed by VnmrJ software (Varian Inc., Palo Alto, USA). The acquired two-dimensional homo- and heteronuclear NMR spectra were processed by NMRPipe<sup>2</sup> and analyzed with Sparky<sup>3</sup> programs. Assignments of <sup>1</sup>H, <sup>13</sup>C, and <sup>15</sup>N resonances for both, [His<sup>1,6</sup>]OXT and [His<sup>1,6</sup>]AVP peptides were done by application of standard procedure<sup>4</sup> based on inspection of two-dimensional homonuclear TOCSY (with mixing times 10 ms and 90 ms) and ROESY (with mixing time 200 and 500 ms) experiments supplemented by 2D heteronuclear <sup>1</sup>H-<sup>13</sup>C HSQC and <sup>1</sup>H-<sup>15</sup>N HSQC spectra recorded on natural abundances of <sup>13</sup>C and <sup>15</sup>N nuclei (see *Supplementary Data BMRB format files*).

***Measurements of spin lattice relaxation rates (R<sub>1</sub>).*** Spin-lattice relaxation rates (*R*<sub>1</sub>) for protons of both peptides with and without 0.02 equivalents of Cu(II) ions were measured with inversion recovery (IR) pulse sequence for isolated peaks in 1D <sup>1</sup>H NMR spectrum. The *R*<sub>1</sub> values were determined by a two-parameter fit of peak intensities to the following equation with the error not bigger than 3%:

$$I(\tau) = I(0)[1 - 2\exp(-\tau R_1)]$$

where  $I(0)$  is initial intensity, and  $\tau$  is interval between  $\pi$  and  $\pi/2$  pulses in pulse sequence.

The obtained experimental spin-lattice  $R_1$  relaxation times are presented in Table 3.

**Determination of metal-proton distances ( $r$ ).** The presence of the paramagnetic ion in the Cu(II)–peptide complex manifests in a selective peak broadening (Figure 1) and changes of spin-lattice relaxation rates.<sup>5</sup> The paramagnetic contribution in the spin-lattice relaxation ( $R_{1b}$ ) can be described by the following equation:<sup>5</sup>

$$R_{1b} = R_{1obs} - p_f R_{1f} = p_b / (R_{1b}^{-1} + \tau_M)$$

where  $\tau_M = k_{off}^{-1}$  is the residence time of peptide molecules in the metal coordination sphere,  $p_f$  and  $p_b$  are the fractions of free and bound peptides,  $R_{1obs}$  and  $R_{1f}$  are the spin-lattice relaxation rates measured after the addition of Cu(II) and in the metal-free solution, respectively, and  $R_{1b}$  is the spin-lattice relaxation rate of Cu(II)-bound ligand.

The distance between metal ion and peptide protons ( $r$ ) can be evaluated based on the Solomon-Bloembergen-Morgan equation<sup>6</sup> which expresses the value of  $R_{1b}$  as a function of the metal-proton distance  $r$  and overall correlation time  $\tau_c$ . In case of Cu(II) cation ( $S = 1/2$ ) the Solomon-Bloembergen-Morgan equation could be written as:

$$R_{1b} = \frac{1}{10} \left( \frac{\mu_0}{4\pi} \right)^2 \frac{\hbar^2 \gamma_I^2 \gamma_S^2}{r^6} \left\{ \frac{\tau_c}{1 + (\omega_I - \omega_S)^2 \tau_c^2} + \frac{3\tau_c}{1 + \omega_I^2 \tau_c^2} + \frac{6\tau_c}{1 + (\omega_I + \omega_S)^2 \tau_c^2} \right\}$$

where  $\mu_0$  is a permeability constant *in vacuo*,  $\gamma_I$  and  $\gamma_S$  are the proton and electron magnetogyric ratios respectively,  $\omega_I$  i  $\omega_S$  are proton and electron Larmor frequencies,  $r$  is the distance between proton and Cu(II) cation, and  $\tau_c$  is a correlation time.

Assuming that Cu(II) cation is coordinated by  $N^{\delta 1}$  nitrogens of histidines we could postulate that the distance between Cu(II) and imidazole ring  $H^{\epsilon 1}$  proton is equal to 3.1 Å. The overall correlation time ( $\tau_c$ ), which is connected with the molecule rotation in the solution, can be

estimated from the various hydrodynamic theories. Presented  $\tau_c$  calculation is based on the Stokes law:<sup>7</sup>

$$\tau_c = \frac{4\pi\eta_w r_H^3}{3k_B T}$$

in which:  $\eta_w$  is solvent viscosity,  $r_H$  – the effective hydrodynamic radius,  $T$  – temperature, and  $k_B$  – Boltzmann's constant. The hydrodynamic radius ( $r_H$ ) is given by the following equation:<sup>7</sup>

$$r_H = \left( \frac{3VM}{4\pi N} \right)^{1/3} + r_w$$

where  $r_w$  is a correction coming from solvation,  $V$  is the specific volume of the peptide, which is  $0.73 \text{ cm}^3 \text{ g}^{-1}$ ,  $M$  is the molecular weight of the peptide and  $N$  is Avagadro's number. Nevertheless, because the estimated distance depends upon the sixth root of the correlation time  $\tau_c$ , the distances obtained from the Solomon-Bloembergen-Morgan equation will be relatively insensitive to a modest error in the value of  $\tau_c$ , e.g. the 400% error in  $\tau_c$  would result in about 1 Å error on distance.

**Structure calculations.** The structure calculations were performed with a CNS 1.2 software<sup>8</sup> by the standard protocol including simulated annealing, slow cooling procedure followed by the final refinement. The paramagnetic contributions,  $R_{1b}$ , were converted into averaged distance constraints (see above) and were used for structure calculations. The list of the distance constraints is presented in Table 1. Finally, 20 out of the 500 initial structures submitted for calculations were selected as representative structures of [His<sup>1,6</sup>]OXT and [His<sup>1,6</sup>]AVP peptides based on the lowest energies criterion. The quality of the resulting structures ensemble was examined by PROCHECK-NMR (v.3.4) program.<sup>9</sup> Figures presenting the structures of the investigated peptides were prepared using MolMol program.<sup>10</sup> The pdb files of [His<sup>1,6</sup>]OXT and [His<sup>1,6</sup>]AVP peptides can be obtained as *Supplementary PDB files*.

## Supplementary references.

- 1 P. Gans, A. Sabatini, A. Vacca, *J. Chem. Soc. Dalton Trans.*, 1985, 1195-1199.
- 2 F. Delaglio, S. Grzesiek, G.W. Vuister, G. Zhu, J. Pfeifer, A. Bax, *Biomol. NMR*. 1995, **6**, 277-293.
- 3 T.D. Goddard, D.G. Kneller, *2003 SPARKY 3*, University of California, San Francisco.
- 4 K. Wüthrich, 1986, *NMR of proteins and nucleic acids*, John Wiley & Sons, New York, USA.
- 5 P. Stanczak, D. Valensin, P. Juszczak, Z. Grzonka, C. Migliorini, E. Molteni, G. Valensin, E. Gaggelli, H. Kozłowski, *Biochemistry*, 2005, **44**, 12940-12954.
- 6 I. Solomon, *Phys. Rev.*, 1955, **99**, 559-565.
- 7 J. Jacob, B. Baker, R.G. Bryant, D.S. Cafiso, *Biophys. J.*, 1999, **77**, 1086-1092.
- 8 (a) A.T. Brünger, P.D. Adams, G.M. Clore, P. Gros, R.W. Grosse-Kunstleve, J.S. Jiang, J. Kuszewski, M. Nilges, N.S. Pannu, R.J. Read, L.M. Rice, T. Simonson, G.L. Warren, *Acta Cryst. D*, 1998, **54**, 905-921. (b) A.T. Brünger, *Nature Prot.*, 2007, **2**, 2728-2733.
- 9 R.A. Laskowski, J.A. Rullmann, M.W. MacArthur, R. Kaptein, J.M. Thornton, *J. Biomol. NMR*, 1996, **8**, 477-486.
- 10 R. Koradi, M. Billeter, K. Wüthrich,; *J. Mol. Graph.*, 1996 **14**, 51-55.

## Supplementary figures.

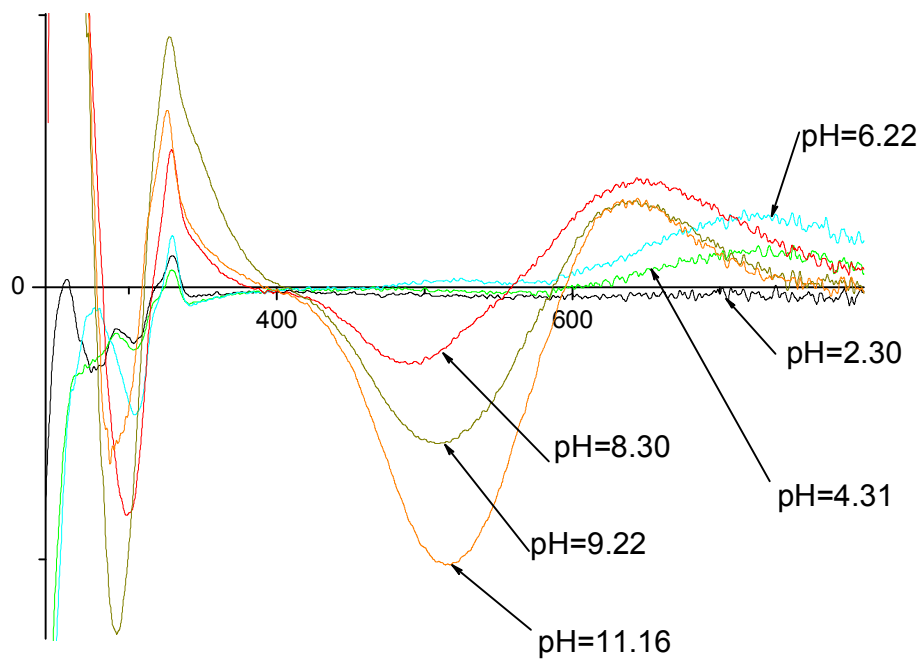

*Figure S1.* CD spectra of Cu<sup>2+</sup>/[His<sup>1,6</sup>]OXT complexes. Ligand concentration  $1 \times 10^{-3}$  mol/dm<sup>3</sup>, ligand to metal ratio 2:1.

a).

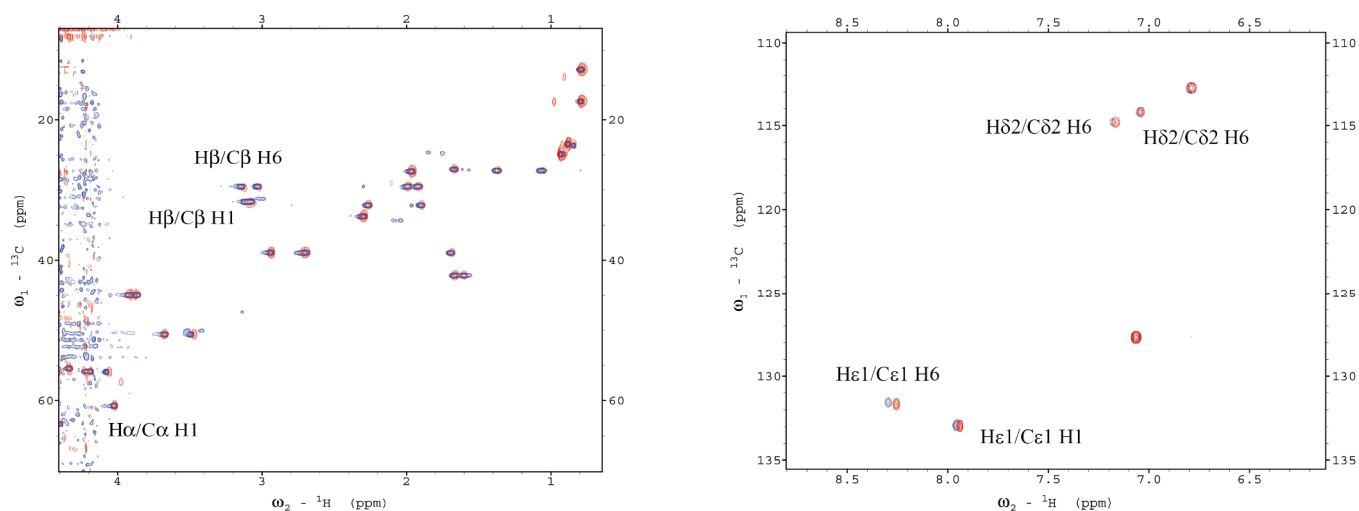

b).

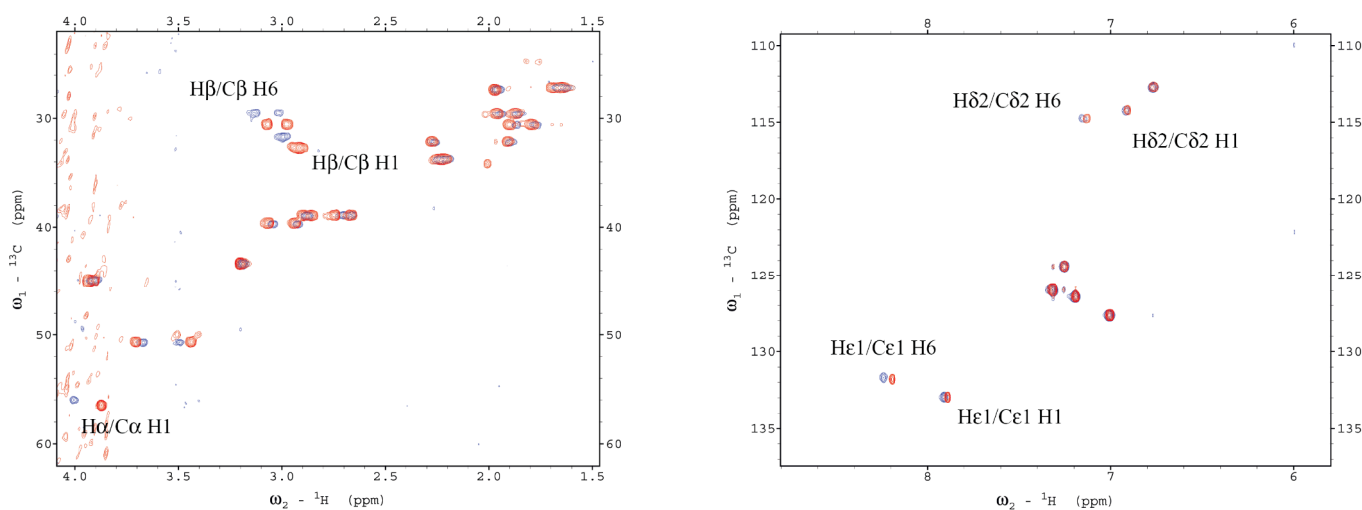

*Figure S2.* The aliphatic (left) and aromatic (right)  $^1\text{H}$ - $^{13}\text{C}$  HSQC experiments for a)  $[\text{His}^{1,6}]\text{OXT}$  and b)  $[\text{His}^{1,6}]\text{AVP}$  peptides. Red cross-peaks correspond to the free peptide, blue ones are spectra recorded for samples after the addition of 0.02 equivalents of  $\text{Cu}(\text{II})$  ions. In case of  $[\text{His}^{1,6}]\text{OXT}$  peptide, the addition of  $\text{Cu}(\text{II})$  does not significantly influence chemical shifts of aliphatic cross-peak resonances, but causes a decrease in the intensities of peaks, which indicates that the chemical exchange process between the ligand and metal is slower than in case of  $[\text{His}^{1,6}]\text{AVP}$ . The intensities of the same cross peaks for the



[His<sup>1,6</sup>]AVP peptide corresponding to the H $\beta$ /C $\beta$  of histidine residues do not change after addition of the Cu(II) ions, however, the chemical shifts of these peaks undergo noticeable changes. These results are consistent with the ratio of residence times of the peptide molecules in the metal coordination sphere of  $\tau_M[\text{His}^{1,6}]\text{OXT}/\tau_M[\text{His}^{1,6}]\text{AVP} \approx 6$ , which clearly supports the conclusions taken from 2D experiments analysis. After the further addition of Cu(II) ions the signals of imidazole protons from histidines involved in the coordination of metal disappear in both cases due to the paramagnetic effect.

## Supplementary tables.

Table S1. The stability constants for the free ligands: [His<sup>1,6</sup>]AVP and [His<sup>1,6</sup>]OXT and for their Cu(II)-complexes.

| Species                                                      | log $\beta$ (free ligand)                |                          |
|--------------------------------------------------------------|------------------------------------------|--------------------------|
|                                                              | [His <sup>1,6</sup> ]OXT                 | [His <sup>1,6</sup> ]AVP |
| HL                                                           | 9.52±0.01                                | 11.39                    |
| H <sub>2</sub> L                                             | 16.73±0.01                               | 21.00                    |
| H <sub>3</sub> L                                             | 22.99±0.01                               | 28.29                    |
| H <sub>4</sub> L                                             | 28.13±0.01                               | 34.55                    |
| H <sub>5</sub> L                                             | -                                        | 39.71                    |
|                                                              |                                          |                          |
| log K <sub>Arg</sub>                                         | -                                        | 11.39                    |
| log K <sub>Tyr</sub>                                         | 9.52                                     | 9.61                     |
| log K <sub>NH2</sub>                                         | 7.21                                     | 7.29                     |
| log K <sub>Im</sub>                                          | 6.26                                     | 6.25                     |
| log K <sub>Im</sub>                                          | 5.14                                     | 5.17                     |
| Species                                                      | log $\beta$ (Cu <sup>2+</sup> complexes) |                          |
| CuH <sub>4</sub> L                                           | -                                        | 39.60                    |
| CuH <sub>3</sub> L                                           | 27.20±0.11                               | 35.83                    |
| CuH <sub>2</sub> L                                           | 24.12±0.01                               | 31.43                    |
| CuHL                                                         | 19.46±0.02                               | 23.71                    |
| CuL                                                          | 11.90±0.03                               | 15.86                    |
| CuH <sub>-1</sub> L                                          | 3.44±0.03                                | 7.41                     |
| CuH <sub>-2</sub> L                                          | -5.41±0.03                               | -2.58                    |
| CuH <sub>-3</sub> L                                          | -15.37±0.03                              | -13.65                   |
| CuH <sub>-4</sub> L                                          | -25.71±0.03                              | -                        |
| log $\beta$ <sub>CuH4L</sub> -log $\beta$ <sub>CuH3L</sub>   | -                                        | 3.77                     |
| log $\beta$ <sub>CuH3L</sub> -log $\beta$ <sub>CuH2L</sub>   | 3.08                                     | 4.40                     |
| log $\beta$ <sub>CuH2L</sub> -log $\beta$ <sub>CuHL</sub>    | 4.66                                     | 7.72                     |
| log $\beta$ <sub>CuHL</sub> -log $\beta$ <sub>CuL</sub>      | 7.56                                     | 7.85                     |
| log $\beta$ <sub>CuL</sub> -log $\beta$ <sub>CuH-1L</sub>    | 8.46                                     | 8.45                     |
| log $\beta$ <sub>CuH-1L</sub> -log $\beta$ <sub>CuH-2L</sub> | 8.85                                     | 9.99                     |
| log $\beta$ <sub>CuH-2L</sub> -log $\beta$ <sub>CuH-3L</sub> | 9.96                                     | 11.07                    |
| log $\beta$ <sub>CuH-3L</sub> -log $\beta$ <sub>CuH-4L</sub> | 10.34                                    | -                        |

Table S2. Spectroscopic data for Cu<sup>2+</sup> complexes with [His<sup>1,6</sup>]OXT and [His<sup>1,6</sup>]AVP.

|                    | [His <sup>1,6</sup> ]OXT |                                            |                      |                                                  |                                           | [His <sup>1,6</sup> ]AVP |                                            |                      |                                                  |                                           |         |     |       |
|--------------------|--------------------------|--------------------------------------------|----------------------|--------------------------------------------------|-------------------------------------------|--------------------------|--------------------------------------------|----------------------|--------------------------------------------------|-------------------------------------------|---------|-----|-------|
|                    | UV-VIS                   |                                            | CD                   |                                                  | EPR                                       | UV-VIS                   |                                            | CD                   |                                                  | EPR                                       |         |     |       |
|                    | $\lambda(\text{nm})$     | $\varepsilon(\text{M}^{-1}\text{cm}^{-1})$ | $\lambda(\text{nm})$ | $\Delta\varepsilon(\text{M}^{-1}\text{cm}^{-1})$ | $A_{\parallel}(\text{G})$ $g_{\parallel}$ | $\lambda(\text{nm})$     | $\varepsilon(\text{M}^{-1}\text{cm}^{-1})$ | $\lambda(\text{nm})$ | $\Delta\varepsilon(\text{M}^{-1}\text{cm}^{-1})$ | $A_{\parallel}(\text{G})$ $g_{\parallel}$ |         |     |       |
| CuH <sub>3</sub> L | -                        | -                                          | -                    | -                                                | -                                         | CuH <sub>4</sub> L       | 730                                        | 25                   | -                                                | 144                                       | 2.375   |     |       |
| CuH <sub>2</sub> L | 671.5                    | 53                                         | 303                  | -0.2317                                          | 162                                       | 2.281                    | 671.5                                      | 35                   | -                                                | -                                         | -       |     |       |
|                    |                          |                                            | 328.5                | 0.0620                                           |                                           |                          |                                            |                      |                                                  |                                           |         |     |       |
|                    |                          |                                            | 340                  | -0.0620                                          |                                           |                          |                                            |                      |                                                  |                                           |         |     |       |
| CuHL               | 643                      | 71                                         | 277.5                | -0.071                                           | 168                                       | 2.260                    | CuH <sub>2</sub> L                         | 632                  | 92                                               | 242                                       | -4.5389 | 190 | 2.242 |
|                    |                          |                                            | 303.5                | -0.4703                                          |                                           |                          |                                            |                      |                                                  | 293.5                                     | -0.3140 |     |       |
|                    |                          |                                            | 329                  | 0.1891                                           |                                           |                          |                                            |                      |                                                  | 466                                       | -0.1420 |     |       |
|                    |                          |                                            | 341.5                | -0.0684                                          |                                           |                          |                                            |                      |                                                  | 673                                       | 0.1338  |     |       |
|                    |                          |                                            | 732                  | 0.269                                            |                                           |                          |                                            |                      |                                                  | 782                                       | -0.1911 |     |       |
| CuL                | 627                      | 95                                         | 295.5                | -0.8389                                          | 179                                       | 2.250                    | CuHL                                       | -                    | -                                                | -                                         | -       | -   |       |
|                    |                          |                                            | 329                  | 0.5022                                           |                                           |                          |                                            |                      |                                                  |                                           |         |     |       |
|                    |                          |                                            | 489                  | -0.2828                                          |                                           |                          |                                            |                      |                                                  |                                           |         |     |       |
|                    |                          |                                            | 643.5                | 0.4004                                           |                                           |                          |                                            |                      |                                                  |                                           |         |     |       |
| CuH <sub>2</sub> L | 509                      | 173                                        | 292                  | -1.2717                                          | -                                         | -                        | CuH <sub>1</sub> L                         | 508.5                | 174                                              | 280                                       | -3.3819 | 211 | 2.173 |
|                    |                          |                                            | 327                  | 0.9202                                           |                                           |                          |                                            |                      |                                                  | 325                                       | 0.5630  |     |       |
|                    |                          |                                            | 510                  | -0.5740                                          |                                           |                          |                                            |                      |                                                  | 532                                       | -0.8448 |     |       |
|                    |                          |                                            | 636.5                | 0.3066                                           |                                           |                          |                                            |                      |                                                  |                                           |         |     |       |
| CuH <sub>3</sub> L | -                        | -                                          | -                    | -                                                | -                                         | -                        | CuH <sub>2</sub> L                         | 507                  | 188                                              | 282                                       | -3.3819 | 210 | 2.170 |
|                    |                          |                                            | 324                  | 0.1755                                           |                                           |                          |                                            |                      |                                                  |                                           |         |     |       |
|                    |                          |                                            | 361                  | -0.1639                                          |                                           |                          |                                            |                      |                                                  |                                           |         |     |       |
|                    |                          |                                            | 532                  | -0.8448                                          |                                           |                          |                                            |                      |                                                  |                                           |         |     |       |
| CuH <sub>4</sub> L | 508.5                    | 196                                        | 289                  | -0.5854                                          | 203                                       | 2.176                    | CuH <sub>3</sub> L                         | 507                  | 189                                              | 288                                       | -2.6732 | 208 | 2.170 |
|                    |                          |                                            | 325.5                | 0.6487                                           |                                           |                          |                                            |                      |                                                  | 361                                       | -0.1639 |     |       |
|                    |                          |                                            | 516.5                | -1.0197                                          |                                           |                          |                                            |                      |                                                  | 530                                       | -1.7596 |     |       |
|                    |                          |                                            | 636.5                | 0.0258                                           |                                           |                          |                                            |                      |                                                  |                                           |         |     |       |

*Table S3.* Proton paramagnetic relaxation contribution ( $R_{1p}$ ), Cu(II)–proton distances ( $r$ ) for 3.2 mM and 2.8 mM [ $\text{His}^{1,6}$ ]OXT and [ $\text{His}^{1,6}$ ]AVP in the presence of 0.02 Cu(II) equivalents, respectively. pH = 6.0, T = 298 K,  $\text{H}_2\text{O}/\text{D}_2\text{O}$  (9:1, v:v) for both samples.

|                                             | $R_{1p}$ ( $\text{s}^{-1}$ ) | $r$ (Å) |                                             | $R_{1p}$ ( $\text{s}^{-1}$ ) | $r$ (Å) |
|---------------------------------------------|------------------------------|---------|---------------------------------------------|------------------------------|---------|
| [ $\text{His}^{1,6}$ ]OXT + 0.02 eq. Cu(II) |                              |         | [ $\text{His}^{1,6}$ ]AVP + 0.02 eq. Cu(II) |                              |         |
| His6 $\text{H}^{\epsilon 1}$                | 15,48                        | 3.1     | His6 $\text{H}^{\epsilon 1}$                | 59,20                        | 3.1     |
| His1 $\text{H}^{\epsilon 1}$                | broad                        | 3.1     | His1 $\text{H}^{\epsilon 1}$                | 64,53                        | 3.1     |
| His6 $\text{H}^{\delta 2}$                  | 5,62                         | 5.1     | His6 $\text{H}^{\delta 2}$                  | 7,76                         | 5.1     |
| His1 $\text{H}^{\delta 2}$                  | 5,64                         | 5.1     | His1 $\text{H}^{\delta 2}$                  | 7,80                         | 5.1     |
| Ile3 $\text{H}^{\text{N}}$                  | 1,75                         | 6.5     | Phe3 $\text{H}^{\text{N}}$                  | 9,67                         | 4.9     |
| Gln4 $\text{H}^{\text{N}}$                  | 1,00                         | 7.2     | Gln4 $\text{H}^{\text{N}}$                  | 0,45                         | 8.3     |
| His6 $\text{H}^{\text{N}}$                  | 2,90                         | 5.9     | Phe3 $\text{H}^{\epsilon}$                  | 4,57                         | 5.6     |
| Leu8 $\text{H}^{\text{N}}$                  | 1,17                         | 7.0     | Phe3 $\text{H}^{\delta}$                    | 1,75                         | 6.6     |
| Gly9 $\text{H}^{\text{N}}$                  | 1,51                         | 6.7     | Phe3 $\text{H}^{\zeta}$                     | 8,66                         | 5.0     |
| Gln4 $\text{H}^{\epsilon 2}$                | 0,09                         | 11.0    | Tyr2 $\text{H}^{\epsilon}$                  | 1,24                         | 7.0     |
| Asn5 $\text{H}^{\delta 2}$                  | 0,24                         | 9.2     | Gln4 $\text{H}^{\epsilon 2}$                | 0,97                         | 7.3     |
| Tyr2 $\text{H}^{\delta}$                    | 9,28                         | 4.4     | Asn5 $\text{H}^{\delta 2}$                  | 0,18                         | 9.7     |
| Tyr2 $\text{H}^{\epsilon}$                  | 9,86                         | 4.3     | Tyr2 $\text{H}^{\alpha}$                    | 2,30                         | 6.3     |
| His1 $\text{H}^{\alpha}$                    | 15,20                        | 3.2     | Phe3 $\text{H}^{\alpha}$                    | 0,76                         | 7.6     |
| Tyr2 $\text{H}^{\alpha}$                    | 1,36                         | 6.8     | Pro7 $\text{H}^{\alpha}$                    | 0,97                         | 7.3     |
| Ile3 $\text{H}^{\alpha}$                    | 0,38                         | 8.5     |                                             |                              |         |
| Asn5 $\text{H}^{\alpha}$                    | 1,17                         | 7.0     |                                             |                              |         |
| His6 $\text{H}^{\alpha}$                    | 5,62                         | 5.1     |                                             |                              |         |
| Pro7 $\text{H}^{\alpha}$                    | 0,79                         | 7.5     |                                             |                              |         |
| Leu8 $\text{H}^{\alpha}$                    | 0,54                         | 8.0     |                                             |                              |         |
| Pro7 $\text{H}^{\delta}$                    | 1,90                         | 6.4     |                                             |                              |         |
